# Supplementary material for: Atmospheric radiocarbon levels were highly variable during the last deglaciation
Source: Springer Nature journal article supplement (doi:10.1038/s43247-023-00929-9), 2023-07-22
Supplement: MOESM1 [file 43247_2023_929_MOESM1_ESM.pdf]

# Supplementary Information

## Increased atmospheric $^{14}\text{C}$ variability during the last deglaciation recorded in European tree-ring chronologies.

Sahra Talamo<sup>1\*</sup>, Michael Friedrich<sup>2\*</sup>, Florian Adolphi<sup>3,4\*</sup>, Bernd Kromer<sup>5</sup>, Timothy J Heaton<sup>6\*</sup>, Silvia Cercatillo<sup>1</sup>, Raimund Muscheler<sup>7</sup>, Dragana Paleček<sup>1</sup>, Enrico Pelloni<sup>1</sup>, Laura Tassoni<sup>1</sup>, Vladimiro Toniello<sup>8</sup>, Lukas Wacker<sup>9</sup>

<sup>1</sup>Department of Chemistry G. Ciamician, Alma Mater Studiorum, University of Bologna Via Selmi 2, Bologna, 40126, Italy

<sup>2</sup>Hohenheim Gardens, University of Hohenheim, 70599 Stuttgart, Germany

<sup>3</sup>Alfred Wegener Institute, Helmholtz Centre for Polar and Marine Research, 27568 Bremerhaven, Germany

<sup>4</sup>Faculty of Geosciences, Bremen University, 28359 Bremen, Germany

<sup>5</sup>Institute for Environmental Physics, University of Heidelberg, 69120 Heidelberg, Germany

<sup>6</sup>Department of Statistics, School, School of Mathematics, University of Leeds, LS2 9JT, UK

<sup>7</sup>Quaternary Sciences, Department of Geology, Lund University, 22362 Lund, Sweden

<sup>8</sup>Vladimiro Toniello Independent researcher

<sup>9</sup>Laboratory for Ion Beam Physics, ETH Zurich, 8093 Zurich, Switzerland

\*Corresponding authors: [sahra.talamo@unibo.it](mailto:sahra.talamo@unibo.it); [michael.friedrich@uni-hohenheim.de](mailto:michael.friedrich@uni-hohenheim.de); [florian.adolphi@awi.de](mailto:florian.adolphi@awi.de); [t.heaton@leeds.ac.uk](mailto:t.heaton@leeds.ac.uk)

Supplementary Figure 1: Ring width of 12 trees of Revine Group 1 (Gr. 1)

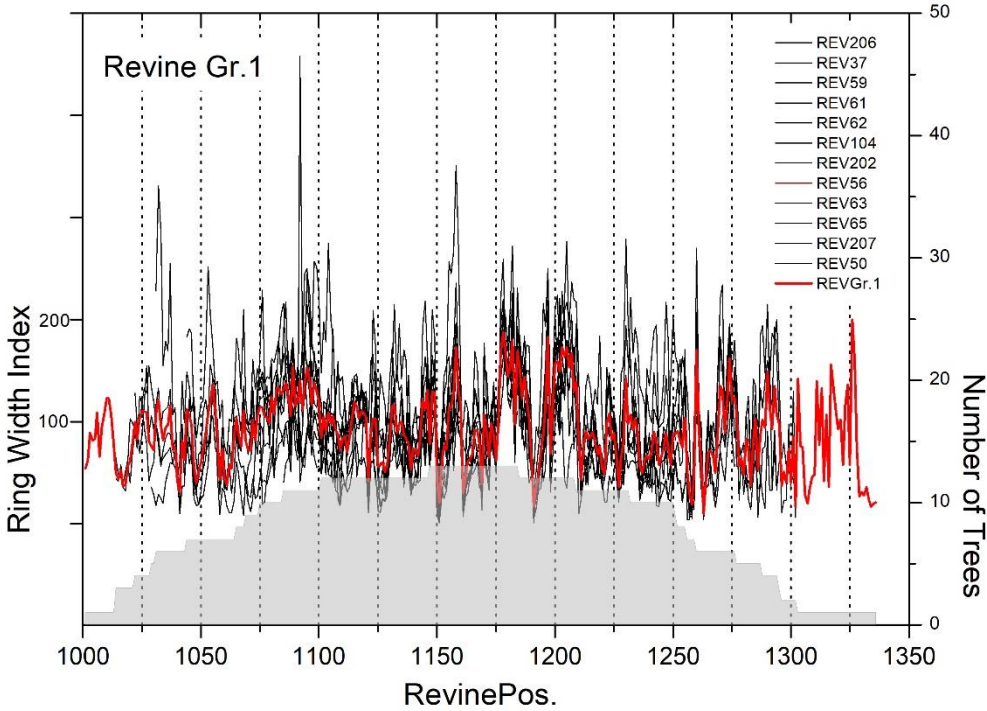

Supplementary Figure 2: Ring width of 3 trees of Revine Group 3 (Gr. 3)

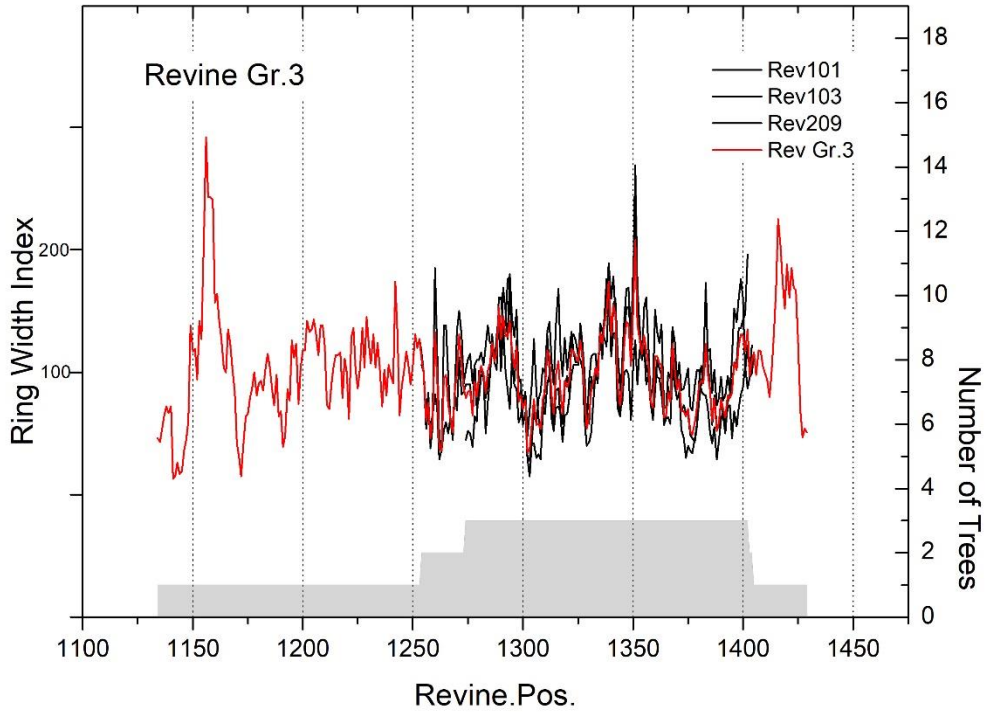

Supplementary Figure 3: Ring width of combined Group 1 & 3 (Gr. 1&3)

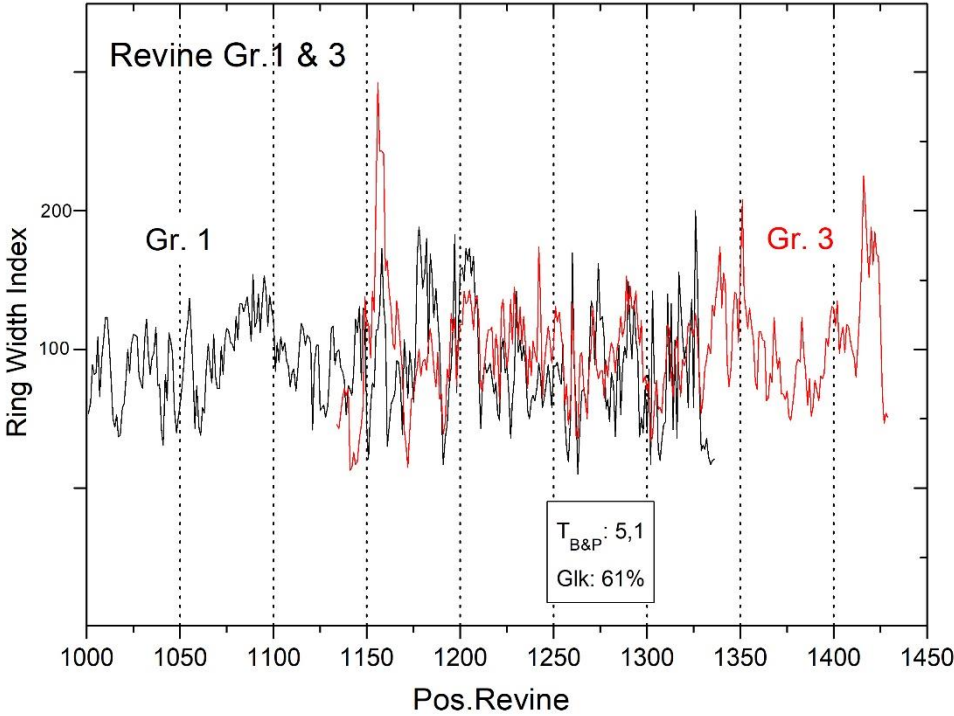

Supplementary Figure 4: Ring width of 2 trees of Revine Group 4 (Gr. 4)

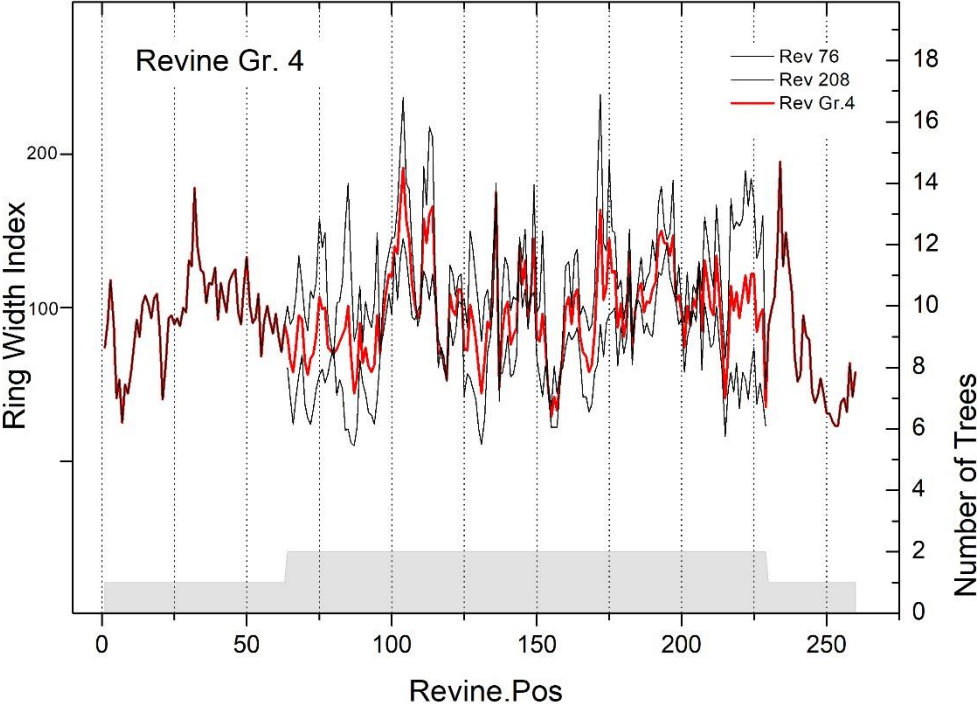

Supplementary Figure 5: Ring width of 4 trees of Revine Group 2 (Gr. 2)

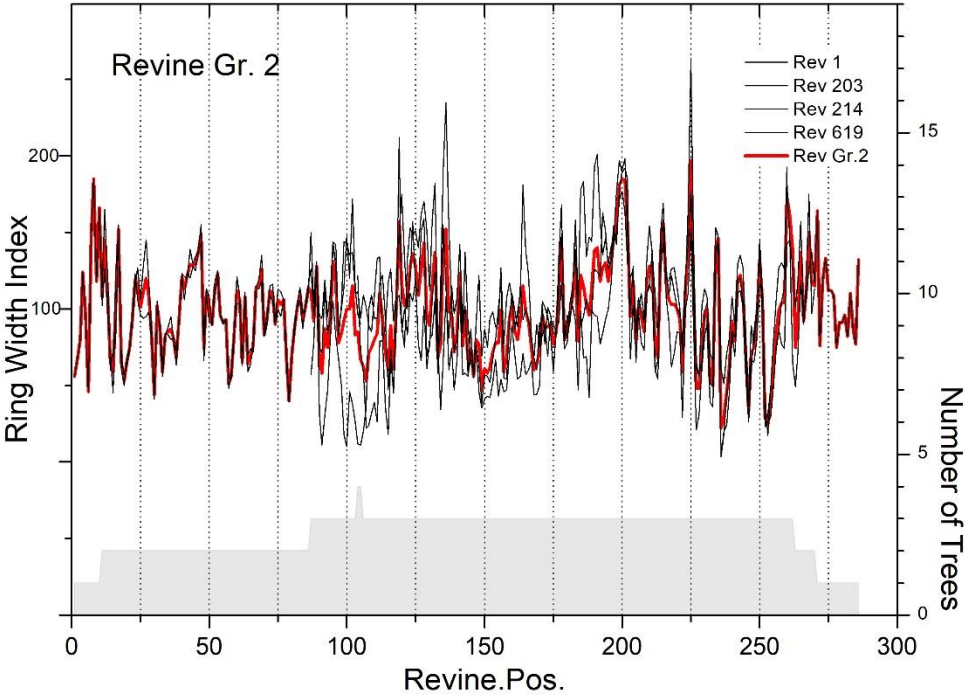

**Supplementary Figure 6:  $\Delta^{14}\text{C}$  amplitude variations at the onset of Younger Dryas and during three strong events in the Holocene**

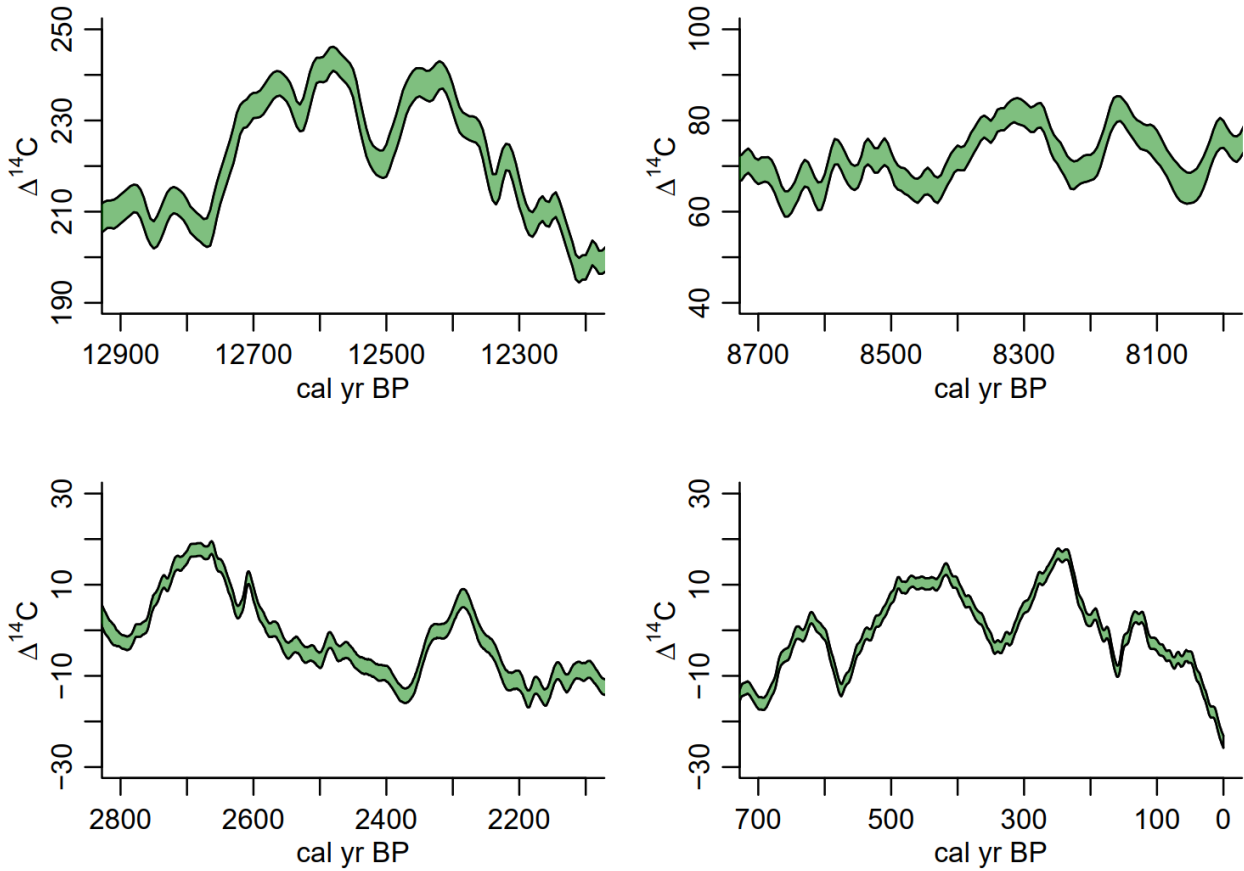

**Supplementary Table 1a-d: Correlation table of the tree-ring series of the different chronologies (group 1 -4) of Revine.** Marked green are the series which significantly cross date with each other following the threshold of tBP > 5,0; GLK > 60. Internal statistical properties of the single trees of the different chronologies (left: sign test as %; right: T<sub>Baillie&Pitcher</sub>). T-values >5 are statistical significant.

| <b>(a) Group 1</b>                  |               |               |               |               |              |               |               |              |              |              |               |              |
|-------------------------------------|---------------|---------------|---------------|---------------|--------------|---------------|---------------|--------------|--------------|--------------|---------------|--------------|
| <b>GLK[%] \ T<sub>B&amp;P</sub></b> | <b>REV206</b> | <b>REV37</b>  | <b>REV59</b>  | <b>REV61</b>  | <b>REV62</b> | <b>REV104</b> | <b>REV202</b> | <b>REV56</b> | <b>REV63</b> | <b>REV65</b> | <b>REV207</b> | <b>REV50</b> |
| REV206                              |               | 4.0           | 9.3           | 7.7           | 7.9          | 5.4           | 6.1           | 10.3         | 7.2          | 8.6          | 9.5           | 8.4          |
| REV37                               | 66.0          |               | 3.7           | 5.1           | 8.4          | 11.1          | 3.2           | 5.5          | 3.3          | 2.7          | 4.4           | 9.7          |
| REV59                               | 65.1          | 59.0          |               | 6.7           | 7.3          | 6.2           | 14.9          | 9.5          | 13.2         | 23.8         | 13.6          | 10.0         |
| REV61                               | 65.5          | 63.9          | 69.7          |               | 7.4          | 7.0           | 5.3           | 12.5         | 5.3          | 7.5          | 7.2           | 5.0          |
| REV62                               | 69.7          | 64.7          | 66.8          | 71.3          |              | 12.6          | 5.3           | 10.0         | 6.6          | 8.8          | 9.0           | 10.8         |
| REV104                              | 61.2          | 63.6          | 61.5          | 67.9          | 69.7         |               | 4.1           | 8.8          | 5.1          | 5.9          | 6.6           | 10.4         |
| REV202                              | 66.1          | 62.6          | 79.7          | 68.9          | 67.0         | 60.0          |               | 7.1          | 12.1         | 13.5         | 12.0          | 7.9          |
| REV56                               | 73.5          | 66.9          | 68.5          | 79.8          | 68.1         | 71.5          | 65.1          |              | 6.8          | 10.1         | 10.6          | 11.0         |
| REV63                               | 66.5          | 58.1          | 74.2          | 68.0          | 65.8         | 58.6          | 76.5          | 65.0         |              | 9.3          | 14.5          | 8.3          |
| REV65                               | 67.1          | 54.9          | 83.3          | 71.9          | 69.1         | 60.3          | 73.5          | 73.1         | 72.0         |              | 14.2          | 8.1          |
| REV207                              | 66.0          | 58.5          | 69.9          | 70.9          | 67.6         | 62.4          | 72.9          | 69.2         | 72.6         | 73.5         |               | 10.3         |
| REV50                               | 73.1          | 72.5          | 67.1          | 60.5          | 68.2         | 68.6          | 65.4          | 68.5         | 67.7         | 59.0         | 62.6          |              |
| <b>(b) Group 3</b>                  |               |               |               |               |              |               |               |              |              |              |               |              |
| <b>GLK[%] \ T<sub>B&amp;P</sub></b> | <b>REV101</b> | <b>REV209</b> | <b>REV103</b> |               |              |               |               |              |              |              |               |              |
| REV101                              |               | 6.0           | 9.7           |               |              |               |               |              |              |              |               |              |
| REV209                              | 62.3          |               | 9.4           |               |              |               |               |              |              |              |               |              |
| REV103                              | 75            | 67.2          |               |               |              |               |               |              |              |              |               |              |
| <b>(c) Group 4</b>                  |               |               |               |               |              |               |               |              |              |              |               |              |
| <b>GLK[%] \ T<sub>B&amp;P</sub></b> | <b>REV76</b>  | <b>REV208</b> |               |               |              |               |               |              |              |              |               |              |
| REV76                               |               | 7.1           |               |               |              |               |               |              |              |              |               |              |
| REV208                              | 67.9          |               |               |               |              |               |               |              |              |              |               |              |
| <b>(d) Group 2</b>                  |               |               |               |               |              |               |               |              |              |              |               |              |
| <b>GLK[%] \ T<sub>B&amp;P</sub></b> | <b>REV214</b> | <b>REV1</b>   | <b>REV203</b> | <b>REV619</b> |              |               |               |              |              |              |               |              |
| REV214                              |               | 10.1          | n. Ovl        | 10.1          |              |               |               |              |              |              |               |              |



|        |         |      |        |        |
|--------|---------|------|--------|--------|
| REV1   | 67.1    |      | 15.9   | 8.8    |
| REV203 | n. Ovl. | 79.3 |        | n. Ovl |
| REV619 | 70.8    | 70.9 | n. Ovl |        |

**Supplementary Table 2: <sup>14</sup>C ages of the Revine chronologies from group 1&3 from group 2 and from group 4**

| Revine group 1 & 3 |          |                     |    |                   |            |
|--------------------|----------|---------------------|----|-------------------|------------|
| start ring         | end ring | <sup>14</sup> C age | ±  | BRAVHO lab number | tree       |
| 2                  | 5        | 15052               | 35 | 5218.1.1          | Revine 59  |
| 6                  | 8        | 15100               | 38 | 5219.1.1          | Revine 59  |
| 12                 | 14       | 15182               | 34 | 5221.1.1          | Revine 59  |
| 21                 | 23       | 15212               | 34 | 5224.1.1          | Revine 59  |
| 30                 | 32       | 15253               | 34 | 5227.1.1          | Revine 59  |
| 39                 | 41       | 15152               | 35 | 5230.1.1          | Revine 59  |
| 48                 | 50       | 15132               | 35 | 5233.1.1          | Revine 59  |
| 57                 | 59       | 15010               | 34 | 5236.1.1          | Revine 59  |
| 66                 | 68       | 15030               | 34 | 5239.1.1          | Revine 59  |
| 75                 | 77       | 15030               | 34 | 5242.1.1          | Revine 59  |
| 84                 | 86       | 15118               | 34 | 5245.1.1          | Revine 59  |
| 93                 | 95       | 15179               | 35 | 5248.1.1          | Revine 59  |
| 102                | 104      | 15142               | 35 | 5251.1.1          | Revine 59  |
| 111                | 113      | 14969               | 38 | 5254.1.1          | Revine 59  |
| 120                | 122      | 15011               | 34 | 5257.1.1          | Revine 59  |
| 129                | 131      | 15052               | 34 | 5260.1.1          | Revine 59  |
| 138                | 142      | 15001               | 34 | 5263.1.1          | Revine 59  |
| 149                | 153      | 15024               | 34 | 5266.1.1          | Revine 59  |
| 160                | 164      | 15053               | 33 | 5269.1.2          | Revine 59  |
| 173                | 175      | 15003               | 34 | 5272.1.1          | Revine 59  |
| 182                | 184      | 15074               | 34 | 5275.1.1          | Revine 59  |
| 207                | 209      | 15074               | 39 | 5350              | Revine 209 |
| 226                | 229      | 15085               | 39 | 5351              | Revine 209 |
| 251                | 253      | 15072               | 39 | 5352              | Revine 209 |
| 273                | 275      | 14962               | 39 | 5353              | Revine 209 |
| 290                | 292      | 14886               | 39 | 5354              | Revine 209 |
| 305                | 307      | 14878               | 39 | 5355              | Revine 209 |
| 326                | 328      | 14870               | 30 | 5356.1.1          | Revine 209 |
| 335                | 337      | 14757               | 30 | 5359.1.1          | Revine 209 |
| 347                | 349      | 14728               | 30 | 5363.1.1          | Revine 209 |
| 356                | 358      | 14756               | 30 | 5366.1.1          | Revine 209 |
| 374                | 376      | 14722               | 31 | 5372.1.1          | Revine 209 |
| 383                | 385      | 14677               | 30 | 5375.1.1          | Revine 209 |
| 401                | 403      | 14661               | 29 | 5381.1.1          | Revine 209 |
| 410                | 412      | 14654               | 29 | 5384.1.1          | Revine 209 |
| 428                | 430      | 14637               | 29 | 5390.1.1          | Revine 209 |
| 437                | 439      | 14653               | 29 | 5393.1.1          | Revine 209 |
| 446                | 448      | 14655               | 29 | 5396.1.1          | Revine 209 |
| 455                | 457      | 14776               | 38 | 5399              | Revine 209 |

| 464                   | 466             | 14720                     | 38       | 5402                     | Revine 209  |
|-----------------------|-----------------|---------------------------|----------|--------------------------|-------------|
| 473                   | 475             | 14727                     | 38       | 5405                     | Revine 209  |
| 191                   | 193             | 15103                     | 29       | 5278                     | Revine 37   |
| 200                   | 202             | 15056                     | 29       | 5281                     | Revine 37   |
| 209                   | 211             | 15052                     | 29       | 5284                     | Revine 37   |
| 221                   | 223             | 15000                     | 29       | 5288                     | Revine 37   |
| 230                   | 232             | 14911                     | 29       | 5291                     | Revine 37   |
| 239                   | 241             | 14930                     | 29       | 5294                     | Revine 37   |
| 248                   | 250             | 14891                     | 29       | 5297                     | Revine 37   |
| 257                   | 259             | 14927                     | 29       | 5300                     | Revine 37   |
| 268                   | 270             | 14909                     | 29       | 5303                     | Revine 37   |
| 280                   | 282             | 14905                     | 28       | 5307                     | Revine 37   |
| 289                   | 291             | 14828                     | 28       | 5310                     | Revine 37   |
| 299                   | 300             | 14767                     | 28       | 5313                     | Revine 37   |
| 310                   | 312             | 14892                     | 29       | 5317                     | Revine 37   |
| 319                   | 321             | 14945                     | 29       | 5320                     | Revine 37   |
| 316                   | 318             | 14910                     | 38       | 5319                     | Revine 37   |
| 322                   | 324             | 14822                     | 37       | 5321                     | Revine 37   |
|                       |                 |                           |          |                          |             |
| <b>Revine group 2</b> |                 |                           |          |                          |             |
| <b>start ring</b>     | <b>end ring</b> | <b><sup>14</sup>C age</b> | <b>±</b> | <b>BRAVHO lab number</b> | <b>tree</b> |
| 3                     | 5               | 14.555                    | 33       | 5524                     | Revine203   |
| 12                    | 14              | 14.537                    | 33       | 5527                     | Revine203   |
| 21                    | 23              | 14.547                    | 33       | 5530                     | Revine203   |
| 31                    | 32              | 14.513                    | 33       | 5533                     | Revine203   |
| 39                    | 41              | 14.451                    | 32       | 5536                     | Revine203   |
| 48                    | 50              | 14.449                    | 32       | 5539                     | Revine203   |
| 60                    | 62              | 14.447                    | 32       | 5543                     | Revine203   |
| 69                    | 71              | 14.374                    | 33       | 5546                     | Revine203   |
| 78                    | 80              | 14.385                    | 32       | 5549                     | Revine203   |
| 87                    | 89              | 14.357                    | 32       | 5552                     | Revine203   |
| 99                    | 1               | 14.369                    | 32       | 5556                     | Revine203   |
| 110                   | 112             | 14.375                    | 32       | 5561                     | Revine1     |
| 119                   | 121             | 14.422                    | 32       | 5564                     | Revine1     |
| 128                   | 130             | 14.393                    | 32       | 5567                     | Revine1     |
| 139                   | 141             | 14.409                    | 32       | 5571                     | Revine1     |
| 150                   | 152             | 14.354                    | 32       | 5575                     | Revine1     |
| 159                   | 161             | 14.400                    | 32       | 5578                     | Revine1     |
| 168                   | 170             | 14.329                    | 32       | 5581                     | Revine1     |
| 177                   | 179             | 14.315                    | 32       | 5584                     | Revine1     |
| 189                   | 191             | 14.255                    | 32       | 5588                     | Revine1     |
| 198                   | 200             | 14.377                    | 32       | 5591                     | Revine1     |
| 210                   | 212             | 14.260                    | 32       | 5595                     | Revine1     |
| 219                   | 221             | 14.343                    | 32       | 5598                     | Revine1     |
| 228                   | 230             | 14.294                    | 32       | 5601                     | Revine1     |

|                       |                 |                           |          |                          |             |
|-----------------------|-----------------|---------------------------|----------|--------------------------|-------------|
| 241                   | 243             | 14.234                    | 32       | 5605                     | Revine1     |
| 250                   | 253             | 14.229                    | 32       | 5608                     | Revine1     |
| 257                   | 259             | 14.200                    | 32       | 5610                     | Revine1     |
|                       |                 |                           |          |                          |             |
| <b>Revine group 4</b> |                 |                           |          |                          |             |
| <b>start ring</b>     | <b>end ring</b> | <b><sup>14</sup>C age</b> | <b>±</b> | <b>BRAVHO lab number</b> | <b>tree</b> |
| 71                    | 73              | 14595                     | 30       | 6012.1.1                 | Revine76    |
| 77                    | 79              | 14599                     | 30       | 6014.1.1                 | Revine76    |
| 83                    | 86              | 14731                     | 32       | 6016                     | Revine76    |
| 87                    | 89              | 14591                     | 29       | 6017.1.1                 | Revine76    |
| 96                    | 98              | 14583                     | 29       | 6021.1.1                 | Revine76    |
| 118                   | 120             | 14592                     | 30       | 6028.1.1                 | Revine76    |
| 127                   | 129             | 14620                     | 29       | 6031.1.1                 | Revine76    |
| 130                   | 131             | 14622                     | 40       | 5499                     | Revine76    |
| 139                   | 141             | 14655                     | 29       | 6035.1.1                 | Revine76    |
| 148                   | 150             | 14617                     | 29       | 6038.1.1                 | Revine76    |
| 157                   | 159             | 14692                     | 29       | 6041.1.1                 | Revine76    |
| 169                   | 171             | 14711                     | 32       | 6045                     | Revine76    |
| 184                   | 186             | 14622                     | 30       | 6050.1.1                 | Revine76    |
| 202                   | 204             | 14770                     | 38       | 5500                     | Revine76    |
| 21                    | 23              | 14657                     | 38       | 5347                     | Revine208   |
| 21                    | 23              | 14557                     | 36       | 6061                     | Revine208   |
| 33                    | 35              | 14649                     | 36       | 6065                     | Revine208   |
| 36                    | 38              | 14656                     | 36       | 6060                     | Revine208   |
| 39                    | 41              | 14669                     | 32       | 6067                     | Revine208   |
| 45                    | 47              | 14670                     | 36       | 6069                     | Revine208   |
| 48                    | 50              | 14651                     | 36       | 6070                     | Revine208   |
| 54                    | 56              | 14579                     | 28       | 6072                     | Revine208   |
| 57                    | 59              | 14598                     | 36       | 6073                     | Revine208   |
| 63                    | 65              | 14592                     | 30       | 6075                     | Revine208   |
| 66                    |                 | 14677                     | 32       |                          | Revine208   |
| 66                    | 68              | 14714                     | 37       | 6076                     | Revine208   |
| 72                    | 74              | 14687                     | 28       | 6078                     | Revine208   |
| 81                    | 83              | 14774                     | 38       | 5345                     | Revine208   |
| 204                   | 206             | 14602                     | 37       | 5346                     | Revine208   |
| 207                   | 209             | 14531                     | 28       | 6079                     | Revine208   |
